# Supplementary material for: Mir204 and Mir211 suppress synovial inflammation and proliferation in rheumatoid arthritis by targeting Ssrp1
Source: eLife. 2022 Dec 13;11:e78085. doi: 10.7554/eLife.78085 (PMC9747153; doi:10.7554/eLife.78085)
Supplement: Figure 1—source data 1. [file elife-78085-fig1-data1.xlsx]

## Sheet: FIG 1
Figure 1A
FLS	NORMAL FLS												CIA FLS
miR-204	1.02191	0.791198	0.88112	0.952147	0.86085	1.03706	1.07185	0.917441	1.18662	1.1783	1.07853	1.11358	0.816962	0.443939	0.825042	0.713324	0.348197	0.77076	0.814839	0.279358	0.702317	0.664212	0.685127	0.737054
miR-211	1.00793	1.00433	0.906419	0.975299	1.08159	1.10878	0.897373	1.13687	1.06983	0.8041	1.08582	0.977811	0.293552	0.1239	0.418358	0.52404	0.516328	0.332869	0.4606	0.420403	0.230465	0.531761
Figure 1B
miR-204								miR-211
	miR-204+miR-211 mimics NC	miR-204+miR-211 mimics	miR-204+miR-211 INHIBITOR NC	miR-204+miR-211 inhibitor					miR-204+miR-211 mimics NC	miR-204+miR-211 mimics	miR-204+miR-211 INHIBITOR NC	miR-204+miR-211 inhibitor
	1.67993	256.368	1.45764	0.109553					1.05049	250.454	1.035	0.106425
	1.05824	275.573	1.01455	0.130631					0.518829	377.655	1.11402	0.110372
	1.06587	551.791	0.964474	0.125272					0.94496	366.957	1.08125	0.114599
	0.891551	312.409	0.898349	0.111964					1.03036	299.524	1.05589	0.092052
	0.941727	222.071	1.31959	0.09819					1.05725	339.308	1.13463	0.098046
	0.855099	278.447	0.710229	0.106883					1.09897	362.404	1.24064	0.094063
	0.793774	402.352	1.18215	0.088632					0.770331	249.998	1.00317	0.118516
	0.827873	241.62	0.70678	0.090387					1.20173	203.37	0.701738	0.081859
	0.942057	221.077	1.29381	0.084381					1.28529	162.993	0.82955	0.088489
	0.689133	363.663	0.682104	0.118812					1.10934	164.644	0.723931	0.123837
	0.954977	189.475	0.941332	0.206452					1.17754	267.568	1.15175	0.075071
	1.80425	297.997	1.19973	0.113533					1.0435	148.018	1.10834	0.087004
Figure S1	miR-204													miR-211
	miR-204+miR-211 mimics NC			miR-204+miR-211 mimics			miR-204+miR-211 INHIBITOR NC			miR-204+miR-211 inhibitor				miR-204+miR-211 mimics NC			miR-204+miR-211 mimics			miR-204+miR-211 INHIBITOR NC			miR-204+miR-211 inhibitor
	24H	48H	74H	24H	48H	74H	24H	48H	74H	24H	48H	74H		24H	48H	74H	24H	48H	74H	24H	48H	74H	24H	48H	74H
	1.36408	1.67993	1.0151	49.2052	256.368	918.131	0.925109	1.45764	0.952194	0.269173	0.109553	0.325302		1.0856	1.05049	0.988944	54.7061	250.454	375.801	0.992134	1.035	1.0647	0.294466	0.106425	0.234196
	0.904216	1.05824	0.967878	52.9	275.573	909.305	0.926765	1.01455	1.03913	0.222902	0.130631	0.409858		1.03599	0.518829	0.965727	54.798	377.655	369.435	0.985805	1.11402	1.05224	0.282702	0.110372	0.250737
	1.12107	1.06587	1.04173	58.264	551.791	887.763	0.886283	0.964474	0.989885	0.245952	0.125272	0.456396		0.951103	0.94496	1.03406	46.2886	366.957	363.57	0.9654	1.08125	0.912255	0.35077	0.114599	0.263327
	0.890563	0.891551	0.977038	71.0228	312.409	911.481	2.00041	0.898349	1.02099	0.251031	0.111964	0.361525		1.08066	1.03036	1.01258	48.7817	299.524	369.226	0.971517	1.05589	0.978459	0.263892	0.092052	0.230248
	0.990999	0.941727	1.075	100.715	222.071	1318.47	0.954118	1.31959	1.13824	0.268091	0.09819	0.494822		0.937783	1.05725	1.0766	97.9458	339.308	562.839	1.01632	1.13463	0.889108	0.432481	0.098046	0.216959
	0.958821	0.855099	0.949791	90.456	278.447	1300.04	0.952792	0.710229	0.997368	0.270098	0.106883	0.457868		0.851123	1.09897	1.01707	102.402	362.404	618.49	0.958824	1.24064	1.01751	0.376913	0.094063	0.260873
	1.00133	0.793774	0.965096	74.0841	402.352	1568.93	0.937386	1.18215	0.979975	0.282898	0.088632	0.405633		1.06374	0.770331	1.0578	87.5741	249.998	600.947	1.01177	1.00317	1.06855	0.363419	0.118516	0.24937
	0.833152	0.827873	1.00701	73.1822	241.62	1399.58	0.929196	0.70678	1.01498	0.321524	0.090387	0.394967		0.876587	1.20173	1.08271	82.8333	203.37	642.475	0.999203	0.701738	0.958049	0.480872	0.081859	0.156518
	0.989801	0.942057	0.869802	81.4015	221.077	1479.87	0.978483	1.29381	0.907979	0.247007	0.084381	0.441231		1.07258	1.28529	1.03905	74.6181	162.993	629.448	1.01584	0.82955	1.00791	0.419982	0.088489	0.202096
	0.998169	0.689133	1.15862	82.3969	363.663	1565.48	0.998536	0.682104	0.975349	0.248137	0.118812	0.45051		1.03035	1.10934	0.767443	74.7353	164.644	653.409	1.02181	0.723931	1.07127	0.387891	0.123837	0.224528
	1.00429	0.954977		73.8663	189.475		0.924427	0.941332		0.259443	0.206452			1.00053	1.17754		81.1032	267.568		0.9925	1.15175		0.387234	0.075071
	1.03244	1.80425		86.4436	297.997		0.91988	1.19973		0.280612	0.113533			1.05121	1.0435		75.4663	148.018		1.07411	1.10834		0.276251	0.087004
Figure S2	Ctrl	Ctrl	Mimics NC	Inhibitor NC
	1.01238	1.28166	1.3196	1.2849
	0.991274	1.31291	1.30905	1.31047
	1.00873	1.28673	1.30641	1.24513
	0.997768	1.30702	1.24046	1.26136
	1.00122	1.27049	1.23295	1.33929
