# Supplementary material for: Mir204 and Mir211 suppress synovial inflammation and proliferation in rheumatoid arthritis by targeting Ssrp1
Source: eLife. 2022 Dec 13;11:e78085. doi: 10.7554/eLife.78085 (PMC9747153; doi:10.7554/eLife.78085)
Supplement: Figure 2—source data 1. [file elife-78085-fig2-data1.xlsx]

## Sheet: FIG 2
Figure 2A
apoptosis	miR-204+miR-211 mimics NC	miR-204+miR-211 mimics	miR-204+miR-211 INHIBITOR NC	miR-204+miR-211 inhibitor
	0.61	0.9	0.75	0.49
	0.68	0.87	0.63	0.43
	0.76	0.93	0.81	0.4
		0.75
Figure 2B
migration	miR-204+miR-211 mimics NC			miR-204+miR-211 mimics			miR-204+miR-211 INHIBITOR NC			miR-204+miR-211 inhibitor
12H	0.257386	0.28987	0.240985	0.107283	0.11873	0.1385	0.400428	0.378865	0.376478	0.76383	0.738726	0.679373
24H	0.668366	0.687958	0.65733	0.36617	0.335772	0.371666	0.500641	0.558273	0.583573	0.864573	0.889387	0.835782
