# Supplementary material for: Mir204 and Mir211 suppress synovial inflammation and proliferation in rheumatoid arthritis by targeting Ssrp1
Source: eLife. 2022 Dec 13;11:e78085. doi: 10.7554/eLife.78085 (PMC9747153; doi:10.7554/eLife.78085)
Supplement: Figure 3—source data 1. [file elife-78085-fig3-data1.xlsx]

## Sheet: FIG 3
Ii1β					Ii6					Ii8					Ii23					Ii4					Ii10					Tgfb1
	miR-204+miR-211 mimics NC	miR-204+miR-211 mimics	miR-204+miR-211 INHIBITOR NC	miR-204+miR-211 inhibitor		miR-204+miR-211 mimics NC	miR-204+miR-211 mimics	miR-204+miR-211 INHIBITOR NC	miR-204+miR-211 inhibitor		miR-204+miR-211 mimics NC	miR-204+miR-211 mimics	miR-204+miR-211 INHIBITOR NC	miR-204+miR-211 inhibitor		miR-204+miR-211 mimics NC	miR-204+miR-211 mimics	miR-204+miR-211 INHIBITOR NC	miR-204+miR-211 inhibitor		miR-204+miR-211 mimics NC	miR-204+miR-211 mimics	miR-204+miR-211 INHIBITOR NC	miR-204+miR-211 inhibitor		miR-204+miR-211 mimics NC	miR-204+miR-211 mimics	miR-204+miR-211 INHIBITOR NC	miR-204+miR-211 inhibitor		miR-204+miR-211 mimics NC	miR-204+miR-211 mimics	miR-204+miR-211 INHIBITOR NC	miR-204+miR-211 inhibitor
	1.21563	0.473241	1.09017	1.16348		0.938338	0.419276	1.01107	1.14291		0.65596	0.078618	1.06668	2.16519		0.923256	0.28591	1.78789	4.01358		0.728479	2.21751	1.12483	0.412175		0.933397	1.65758	0.621574	1.17726		0.995823	1.13368	1.12236	0.618305
	0.941958	0.45124	1.20292	1.25532		0.897512	0.476685	1.11679	1.22887		0.65596	0.159896	0.879572	1.43542		0.713758	0.398834	0.178503	2.27138		0.744459	2.7293	0.856992	0.651565		0.987358	1.60415	0.741828	1.18843		1.0641	1.37034	1.06297	0.702812
	1.22587	0.61134	1.071	1.25018		1.14003	0.347696	0.784971	1.22428		0.65596	0.052405	0.977695	4.26104		0.814579	0.446928	0.408895	7.45785		0.760792	3.35921	1.25835	0.483391		1.70203	1.60083	1.03592	0.434829		0.948621	1.262	1.21148	0.616555
	0.902225	0.545691	0.840281	1.35066		0.884199	0.381856	0.775492	1.19144		1.04391	0.204535	1.05784	3.78194		0.637518	0.315399	0.684977	3.58795		0.863932	3.55935	0.900898	0.160285		1.23778	1.59649	0.823716	0.662689		1.02516	1.37234	0.983059	0.587879
	1.09415	0.64674	0.814601	1.28232		1.15322	0.456527	0.94333	1.16575		1.26048	0.287826	1.0397	1.32683		0.833463	0.077291	0.558984	2.72926		2.38423	5.02272	0.91834	0.092511		1.33315	1.90072	0.872776	0.230105		0.924808	1.49007	1.11641	0.697322
	0.995597	0.875029	0.876734	1.53597		1.08187	0.347029	0.920592	1.06917		0.886965	0.265965	0.978513	1.9134		0.704653	0.111949	0.730613	2.2391		0.313049	1.79382	0.940588	0.839511		0.674825	2.10975	0.95578	0.362321		0.94652	1.51632	1.04744	0.473449
	1.24146	0.592588	1.05864	1.23896		0.940226	0.336915	0.881957			1.70311	0.20176		1.53242		1.26079	0.111886	0.549805	1.95254		1.20506			0.125696		0.385023	1.6242	1.33707	0.445218		0.999577	1.38421	1.08075	0.469789
	1.03145	0.762183	1.05468	1.0935		0.954239	0.421215				1.13765	1.24296				1.62513	0.16108	1.1626	4.99206					0.08405		0.62149		1.24657	0.276637		0.934721		1.03585	0.48784
	1.04952	0.516689	1.06261	1.18976		1.05234						1.09209				0.893453	0.413269	0.839171						0.089204		1.12494		1.11757	0.312458		1.0169		1.32164
	1.29899	0.405603														0.995978	0.251308	3.63947										1.24719	0.299147		1.0188		1.1949
		0.336739														1.59742	0.516897	0.459083													1.03264
		0.454771																2.19441
