# Supplementary material for: Mir204 and Mir211 suppress synovial inflammation and proliferation in rheumatoid arthritis by targeting Ssrp1
Source: eLife. 2022 Dec 13;11:e78085. doi: 10.7554/eLife.78085 (PMC9747153; doi:10.7554/eLife.78085)
Supplement: Figure 4—source data 1. [file elife-78085-fig4-data1.xlsx]

## Sheet: FIG 4
Figure 4A
P65					IκBα					IKKα					IKKβ
	miR-204+miR-211 mimics NC	miR-204+miR-211 mimics	miR-204+miR-211 INHIBITOR NC	miR-204+miR-211 inhibitor		miR-204+miR-211 mimics NC	miR-204+miR-211 mimics	miR-204+miR-211 INHIBITOR NC	miR-204+miR-211 inhibitor		miR-204+miR-211 mimics NC	miR-204+miR-211 mimics	miR-204+miR-211 INHIBITOR NC	miR-204+miR-211 inhibitor		miR-204+miR-211 mimics NC	miR-204+miR-211 mimics	miR-204+miR-211 INHIBITOR NC	miR-204+miR-211 inhibitor
	1.12831	0.26786	1.37332	4.00882		1.29643	1.66829	1.23785	0.420357		1.32479	0.488642	1.18414	1.81813		1.04863	0.952928	0.973784	0.997478
	1.29886	0.227572	0.739547	2.74274		1.07885	2.42201	1.39487	0.290596		1.43216	0.377537	1.06899	1.41709		0.994152	0.947619	1.01824	0.949002
	0.572834	0.195155	0.887137	2.81843		1.12472	2.20275	0.967278	0.284224		0.618499	0.381622	0.920584	1.36181		1.02048	0.946221	0.981227	1.01844
											0.624559	0.25216	0.82628	1.41062
