# Supplementary material for: Mir204 and Mir211 suppress synovial inflammation and proliferation in rheumatoid arthritis by targeting Ssrp1
Source: eLife. 2022 Dec 13;11:e78085. doi: 10.7554/eLife.78085 (PMC9747153; doi:10.7554/eLife.78085)
Supplement: Figure 5—source data 1. [file elife-78085-fig5-data1.xlsx]

## Sheet: FIG 5
	Figure 5A					Figure 5B
CCK-8	miR-204+miR-211 mimics NC	miR-204+miR-211 mimics	miR-204+miR-211 INHIBITOR NC	miR-204+miR-211 inhibitor				miR-204+miR-211 mimics NC			miR-204+miR-211 mimics			miR-204+miR-211 INHIBITOR NC			miR-204+miR-211 inhibitor
	0.959206	0.768289	1.01193	1.16804			G0/G1	71.56	73.77	75.41	82.18	84.03	82.09	82.84	82.83	82.37	77.42	77.63	77.16
	0.971716	0.917324	0.991202	1.18267			S+G2/M	28.44	26.23	24.59	17.82	15.97	17.91	17.17	17.17	17.63	22.75	22.37	22.84
	0.995649	0.921675	0.912235	1.17383
	0.975795	0.929562	1.06407	1.23908
	0.992657	0.867827	1.05279	1.21804
	0.966005	0.911069	1.02352	1.12322
	1.06445	0.890128	0.944248	1.10096
	0.949959	0.825673		1.20493
	1.00843	0.937993		1.28939
	1.09192	0.895295
	1.02421	0.936633
	Figure 5C
	Ccnd1				Cdkn2a					Cdkn1a					Cdkn1c
	miR-204+miR-211 mimics NC	miR-204+miR-211 mimics	miR-204+miR-211 INHIBITOR NC	miR-204+miR-211 inhibitor		miR-204+miR-211 mimics NC	miR-204+miR-211 mimics	miR-204+miR-211 INHIBITOR NC	miR-204+miR-211 inhibitor		miR-204+miR-211 mimics NC	miR-204+miR-211 mimics	miR-204+miR-211 INHIBITOR NC	miR-204+miR-211 inhibitor		miR-204+miR-211 mimics NC	miR-204+miR-211 mimics	miR-204+miR-211 INHIBITOR NC	miR-204+miR-211 inhibitor
	1.2439	0.560047	0.713384	7.65332		0.560811	2.71928	1.56856	0.663812		0.960302	1.22934	1.08759	0.797133		0.94862	3.35549	2.04935	0.173364
	0.937475	0.487176	0.636033	4.37189		0.53979	3.95071	0.581961	0.113806		1.04711	1.25749	1.00896	0.735851		2.10477	3.21638	1.36918	0.230647
	0.797249	0.488634	0.673599	2.4974		1.86055	2.87658	0.796497	0.139913		1.1345	2.4061	0.991215	0.765879		0.516326	4.21594	0.405893	0.230658
	1.41261	0.680389	1.56174	7.61598		1.57197	3.63599	0.677469	0.092571		1.01969	1.75091	1.01313	0.66068		0.973902	5.52615	0.876968	0.065474
	0.89351	0.460046	0.443869	3.25007		0.531669	1.78946	1.37551	0.861428		0.948804	1.34375	1.12708	0.709087		0.771006	1.79108	0.298615	0.122852
	0.804026	0.643624	0.524527	5.94677		0.817334	3.48386				0.910908	1.61649	0.990497	0.507826		0.983415	4.49418
	0.911237	0.318541	1.27064	8.78523		0.550692	2.64509				0.978684		0.781528	0.701603		0.701966	5.33273
		0.601503	3.07816			0.675209	1.54888
			0.803056			1.22428
	Figure 5D
	PI3K					P-AKT					P53
		miR-204+miR-211 mimics NC	miR-204+miR-211 mimics	miR-204+miR-211 INHIBITOR NC	miR-204+miR-211 inhibitor		miR-204+miR-211 mimics NC	miR-204+miR-211 mimics	miR-204+miR-211 INHIBITOR NC	miR-204+miR-211 inhibitor		miR-204+miR-211 mimics NC	miR-204+miR-211 mimics	miR-204+miR-211 INHIBITOR NC	miR-204+miR-211 inhibitor
		0.944027	0.616292	1.1784	2.04393		1.32269	0.542118	1.17058	1.75795		1.63137	3.63606	0.882601	0.321982
		1.03865	0.74049	1.10925	1.93517		0.862941	0.523843	0.82234	1.33911		0.784615	2.77432	0.786071	0.406187
		1.01732	0.420702	1.11339	2.09862		0.700947	0.399083	0.783721	1.35935		0.584012	2.47724	0.702071	0.501404
							1.11342	0.638168	1.22336	2.42999
