# Supplementary material for: Mir204 and Mir211 suppress synovial inflammation and proliferation in rheumatoid arthritis by targeting Ssrp1
Source: eLife. 2022 Dec 13;11:e78085. doi: 10.7554/eLife.78085 (PMC9747153; doi:10.7554/eLife.78085)
Supplement: Figure 6—source data 1. [file elife-78085-fig6-data1.xlsx]

## Sheet: FIG 6
Figure 6C
MOUSE FLS			RAT FLS
	NORMAL MOUSE FLS	CIA MOUSE FLS		NORMAL RAT FLS	CIA RAT FLS
	0.942534	3.24294		0.964529	2.24693
	1.07004	3.68035		0.943856	3.30984
	0.987425	1.99994		1.09162	3.23602
Figure 6D
PCR
Ssrp1							WESTERN BLOTTING
	miR-204+miR-211 mimics NC	miR-204+miR-211 mimics	miR-204+miR-211 INHIBITOR NC	miR-204+miR-211 inhibitor				miR-204+miR-211 mimics NC	miR-204+miR-211 mimics	miR-204+miR-211 INHIBITOR NC	miR-204+miR-211 inhibitor
	1.0844	0.556629	1.19083	1.54197				1.1811	0.095899	1.04097	1.36511
	0.765352	0.477111	1.18923	1.50189				0.788852	0.147341	1.06447	1.56365
	0.93274	0.539049	1.21409	1.76136				1.03005	0.141625	0.89456	1.30694
	0.975143	0.530359	0.943666	1.21685
	0.921654	0.325983	0.923074	1.46851
	1.07288	0.319618	1.18755	1.7159
	1.00013	0.349904	0.709614	1.83312
	1.15894	0.303213	0.859356
	0.909097	0.326933	0.870713
	1.17845	0.285142	0.911874
	1.02658	0.426574
	0.974643	0.241271
