# Supplementary material for: Mir204 and Mir211 suppress synovial inflammation and proliferation in rheumatoid arthritis by targeting Ssrp1
Source: eLife. 2022 Dec 13;11:e78085. doi: 10.7554/eLife.78085 (PMC9747153; doi:10.7554/eLife.78085)
Supplement: Figure 7—source data 1. [file elife-78085-fig7-data1.xlsx]

## Sheet: FIG 7
Figure 7A							Figure 7B
WB	Ctrl	miR-204+miR-211 mimics	miR-204+miR-211 mimics+SSRP1				Ki-67	Ctrl	miR-204+miR-211 mimics	miR-204+miR-211 mimics+SSRP1
	1.35092	0.714455	3.70965					47	23	76
	0.817695	0.565604	3.08182					55	19	65
	1.0744	0.706969	3.88121					43	29	88
	0.756985	0.575224	3.54137
Figure Supplement
SSRP1/GAPDH	ctrl group	SSRP1 group	Negative ctrl group
	0.975287	2.70489	0.800758
	0.924402	2.32487	0.856556
	1.10031	2.57398	0.836499
