# Supplementary material for: Mir204 and Mir211 suppress synovial inflammation and proliferation in rheumatoid arthritis by targeting Ssrp1
Source: eLife. 2022 Dec 13;11:e78085. doi: 10.7554/eLife.78085 (PMC9747153; doi:10.7554/eLife.78085)
Supplement: Figure 8—source data 1. [file elife-78085-fig8-data1.xlsx]

## Sheet: FIG8
Figure 8A
BODY WEIGHT	CIA wt						CIA dKO
0	22.02	21.65	22.2	21.92	23.65	22.4	23.5	20.33	22.98	24.5	22.13	21.78
4	24.2	23.18	23.08	23.2	20.98	22.08	21.47	23.81	22.89	22.17	23.11	23.89
8	23.1	24.19	23.02	21.8	24.99	24.02	22.68	24.15	23.35	22.16	24.15	23.35
12	24.18	26.08	24.42	24.08	26.08	24.42	23.83	24.29	24.24	24.13	24.29	24.24
16	26.9	24.6	25.13	26	24.6	25.3	25.1	23.9	24.9	25.1	23.9	24.9
19	24.6	24.17	25.9	25.88	26.7	26.3	24.1	25.1	26.2	23.11	24.31	25.2
23	26.7	25.5	24.3	25.7	27	25.3	26.1	24.8	23.9	27.1	25.18	24.19
28	24.2	25.6	28.3	25.2	26.6	27.3	25.4	25.5	25.4	26.4	26.7	26.14
33	26.14	25.9	27.16	27.4	26.9	26.6	25.8	27	25.5	27.8	27.4	25.65
37	27.2	27	27.75	28.2	27.6	27.5	25.5	26.2	27.2	26.75	27.12	28.12
ARTHRITIS	CIA wt						CIA dKO
0	0	0	0	0	0	0	0	0	0	0	0	0
4	0	0	0	0	0	0	0	0	0	0	0	0
8	0	0	0	0	0	0	0	1	3	2	2	3
12	0	0	0	0	0	0	8	9	6	7	9	5
16	0	0	0	0	0	0	12	7	12	14	7	12
19	0	0	0	0	0	0	14	8	11	16	10	13
23	0	0	0	0	0	0	16	16	10	11	16	10
28	0	0	0	0	0	0	16	8	8	16	9	9
33	3	0	0	3	0	0	12	9	8	12	9	9
37	4	0	0	4	0	0	12	7	9	13	9	9
PAW SWELLING	CIA wt						CIA dKO
0	2.12	1.97	2.13	2.1	2.01	2.11	2.1	2.04	2.03	2.12	2.09	2.08
4	2.13	2.15	2	2.11	2.05	2.01	1.92	2.13	2.07	1.98	2.23	2.07
8	2.14	1.98	2.18	2	1.99	2.15	2.37	2.78	2.23	2.45	2.88	2.1
12	2.04	1.98	2.03	2.01	1.98	2.02	2.41	2.7	2.67	2.41	3.3	2.6
16	2.03	2.26	2.17	2.02	2.16	2.1	2.37	2.98	2.98	2.79	2.72	2.88
19	2.08	2.05	2.18	1.99	2.15	2.18	2.61	3.12	3.19	2.81	3.11	3.16
23	1.98	2.11	2.11	2.04	2.12	2.12	3.34	3.18	3.87	3.14	3.08	3.94
28	1.99	2.04	2.09	1.98	2.14	2.02	3.59	3.22	2.37	3.69	3.27	2.57
33	2.04	1.99	2.07	2.1	2.04	2.05	3.12	2.67	2.62	3.02	2.62	2.6
37	1.97	2	2.08	1.99	2.11	2.09	2.48	2.53	2.46	2.58	2.63	2.36
Figure 8B
	CIA WT						CIA DKO
Hyperplasia	1	1	1	1	2	1	3	3	3	3	3	2
Pannus formation	0	0	1	1	1	1	3	2	2	1	3	3
Cartilage destruction	0	0	1	1	1	1	3	3	1	3	2	2
SSRP1 POSITIVE CELLS	CIA WT	CIA DKO
	7	70
	5	76
	5	65
	11	77
	18	83
	7	73
