# Supplementary material for: Mir204 and Mir211 suppress synovial inflammation and proliferation in rheumatoid arthritis by targeting Ssrp1
Source: eLife. 2022 Dec 13;11:e78085. doi: 10.7554/eLife.78085 (PMC9747153; doi:10.7554/eLife.78085)
Supplement: Figure 9—source data 1. [file elife-78085-fig9-data1.xlsx]

## Sheet: FIG8
Figure 9A
BODY WEIGHT	AAV-shRNA Dko						AAV-shRNA CIA dKO						AAV-shSSRP1 CIA dKO
0	22.32	22.85	20.2	20.53	21.67	21.49	21.6	20.7	20.88	23.5	19.93	22.2	19.8	21.2	21	22.85	20.13	22.27
4	23	23.88	22.48	24.2	21.28	22.08	22.17	22.11	23.09	23.04	22.11	21.89	21.11	22.11	22.99	24.24	24.01	22.09
8	23.14	23.79	22.42	22.84	23.49	23.72	24.68	23.1	22.44	23	23.24	22.85	25.18	24.12	23.24	23.01	21.84	20.86
12	24.28	25.88	23.92	24.38	25.88	24.72	23.53	25.11	23.14	22.99	23.17	23.74	23.53	25.11	23.14	22.99	23.17	23.74
16	26.3	25.3	25.83	25.33	25.3	23.7	25.67	24.13	24.22	26.18	24.19	24.51	24.7	25.07	25.29	26.45	25.01	23.19
19	25.8	25.07	25.2	24.99	25.5	26.4	23.6	25.9	26.34	24.78	25.8	24.2	24.06	25.12	25.09	25.99	26.87	25.22
23	25.2	26.3	25.3	25.45	26.98	24.3	24.1	23.2	24.8	27.1	26.18	24.05	24.1	27.2	25.8	26.1	24.18	24.05
28	25.8	26.7	27.4	24.2	25.3	24.3	24.4	27	26.1	23.64	25.5	24.74	24.4	26.88	26.1	26.64	25.5	24.74
33	26.14	25.9	27.16	27.4	26.9	26.6	25.2	26.34	26.2	23.8	25.14	24.65	26.12	24.04	27.15	24.08	26.94	25.67
37	28.4	25.6	26.55	27.1	27.6	26.6	24.52	25.11	25.32	25.66	26.02	27.77	27.12	26.91	25	26.16	26.82	27.55
ARTHRITIS	AAV-shRNA Dko						AAV-shRNA CIA dKO						AAV-shSSRP1 CIA dKO
0	0	0	0	0	0	0	0	0	0	0	0	0	0	0	0	0	0	0
4	0	0	0	0	0	0	0	0	0	0	0	0	0	0	0	0	0	0
8	0	0	0	0	0	0	3	2	3	1	2	3	3	4	7	5	0	0
12	0	0	0	0	0	0	7	8	7	7	10	5	3	5	8	4	2	2
16	0	0	0	0	0	0	11	8	12	13	9	10	3	3	9	3	2	2
19	0	0	0	0	0	0	13	9	12	16	11	12	1	1	8	4	1	2
23	0	0	0	0	0	0	16	16	16	12	11	12	4	5	5	2	1	2
28	0	0	0	0	0	0	16	12	16	16	11	9	2	2	3	5	1	1
33	0	0	0	0	0	0	12	16	11	12	11	10	4	3	2	1	0	4
37	0	0	0	0	0	0	12	9	11	13	11	13	2	3	5	2	4	0
PAW SWELLING	AAV-shRNA Dko						AAV-shRNA CIA dKO						AAV-shSSRP1 CIA dKO
0	2.135	1.87	1.86	2.01	1.78	1.85	1.95	1.99	1.72	1.77	1.86	2.08	2.14	1.97	1.89	1.89	2.02	1.78
4	2	1.87	2	2.11	1.83	2.01	1.92	2.12	2.02	2.08	1.96	1.99	2	1.98	2.07	1.98	1.99	2.2
8	2.21	1.99	1.98	2.06	2	1.98	2.58	2.99	2.23	2.71	2.58	2.1	2.12	2.2	2.88	2.76	3.28	2.28
12	1.98	1.98	2.03	2.07	1.89	2	2.9	2.83	2.28	2.41	3.3	2.86	2.27	3.14	2.27	3.12	3.02	2.18
16	2	2.07	2.13	2.02	2.13	2.1	4.12	3.76	2.88	2.33	2.52	2.98	2.51	2.59	2.1	2.38	3.1	3.11
19	2.08	2.07	2.08	1.99	2.19	2.11	3.61	3.12	2.88	2.81	3.17	3.06	2.12	2.84	2.55	2.88	2.21	2.07
23	2.14	2.11	2.03	2.06	2.15	2.12	3.68	3.5	3.56	3.75	4.08	3.88	2.22	3.01	2.34	2.16	3	2.18
28	1.99	2.14	2.19	1.99	2.04	2.07	3.26	3.66	3.76	3.67	3.98	2.69	2.24	2.88	2.18	2.55	2.34	2.83
33	2.14	2.09	2.17	2.13	2.14	2.05	3.02	3.77	2.82	3.02	2.62	2.5	2.14	2.22	2.56	2.57	2.39	2.53
37	2	2.14	2.05	2.03	2.13	2.08	2.53	3.3	2.56	2.58	2.77	2.32	2.18	2.51	2.34	2.38	1.98	2.08
Figure 9B
	AAV-shRNA Dko						AAV-shRNA CIA dKO						AAV-shSSRP1 CIA dKO
Hyperplasia	0	0	0	0	0	0	4	4	4	3	4	3	2	1	1	2	1	1	1
Pannus formation	0	0	0	0	0	0	3	2	4	2	3	3	1	0	0	2	1	1	1
Cartilage destruction	0	0	0	0	0	0	3	3	4	4	3	2	2	2	1	0	1	1	1
